# Supplementary material for: Matching the Budyko functions with the complementary evaporation relationship: consequences for the drying power of the air and the Priestley–Taylor coefficient
Source: Copernicus journal article supplement (doi:10.5194/hess-20-4857-2016), 2016-12-09
Supplement: Supplementary file 1 [file hess-20-4857-2016-supplement.pdf]

Supplement of Hydrol. Earth Syst. Sci., 20, 4857–4865, 2016  
<http://www.hydrol-earth-syst-sci.net/20/4857/2016/>  
doi:10.5194/hess-20-4857-2016-supplement  
© Author(s) 2016. CC Attribution 3.0 License.

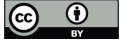

*Supplement of*

## **Matching the Budyko functions with the complementary evaporation relationship: consequences for the drying power of the air and the Priestley–Taylor coefficient**

**J.-P. Lhomme and R. Moussa**

*Correspondence to:* Roger Moussa (roger.moussa@inra.fr)

The copyright of individual parts of the supplement might differ from the CC-BY 3.0 licence.

### S.1 Properties of the function $E/P = B_I'(\Phi_0)$

Putting  $y = E/P$  with  $0 \leq y \leq 1$ ,  $x = \Phi_0$  and  $a = \alpha_0 / [(1+b)\alpha_w]$ , function  $B_I'$  given by Eq. (20) can be rewritten as:

$$10 \quad x = a \left[ (y^{-\lambda} - 1)^{-1/\lambda} + by \right]. \quad (\text{S1.1})$$

For  $x = 0$ ,  $y$  is obviously equal to 0. When  $x$  tends to infinite the result is less evident. Eq. (S1.1) can be rewritten as:

$$\frac{x}{a} - by = \frac{1}{\left(\frac{1}{y^\lambda} - 1\right)^{\frac{1}{\lambda}}}. \quad (\text{S1.2})$$

When  $x$  tends to infinite, given that  $y$  is limited by 1, the right-hand term of the equation should tend to infinite. This means that  $y$  should tend to 1 so that the denominator tends to zero.

15 The derivative of the function (Eq. S1.1) is given by:

$$\frac{dx}{dy} = a \left[ b + y^{-(\lambda+1)} (y^{-\lambda} - 1)^{-\frac{1}{\lambda}-1} \right], \quad (\text{S1.3})$$

which can be rewritten as:

$$\frac{dy}{dx} = \frac{1}{a} \left[ b + (1 - y^\lambda)^{-(1+\lambda)/\lambda} \right]^{-1}. \quad (\text{S1.4})$$

Close to  $x = 0$ ,  $y$  is close to zero and the derivative can be approximated by:

$$20 \quad \frac{dy}{dx} \approx \frac{1}{a(1+b)} \left[ 1 - \left( \frac{1+\lambda}{\lambda(1+b)} \right) y^\lambda \right] \approx \frac{\alpha_w}{\alpha_0}. \quad (\text{S1.5})$$

If Eq. (22) is taken into account:

$$\frac{\alpha_w}{\alpha_0} = \frac{\left[ 1 + b(1+x^\lambda)^{-\frac{1}{\lambda}} \right]}{(1+b)}, \quad (\text{S1.6})$$

which means that  $\alpha_w/\alpha_0$  and  $dy/dx$  tend to 1 when  $x$  tends to zero.

## S.2 Properties of the function $E/E_0 = B_2'(\Phi_0^{-1})$

With  $X = \Phi_0^{-1}$ ,  $Y = E/E_0$  and the parameter  $a$  defined as above in S1, function  $B_2'$  (Eq. 21) can be written as

$$X^{-\lambda} = Y^{-\lambda} - \left(\frac{1}{a} - bY\right)^{-\lambda}. \quad (\text{S2.1})$$

- When  $X$  tends to zero,  $Y$  (limited by  $I$ ) necessarily tends to zero, and when  $X$  tends to infinite  $Y$  tends to  $I/[(I+b)a] = \alpha_w/\alpha_0$ ,  
 5 which is equal to  $I$  according to Eq. (S1.6) ( $x = I/X = 0$ ).

The derivative of  $B_2'$  can be written as:

$$\frac{dY}{dX} = \frac{X^{-\lambda-1}}{Y^{-\lambda-1} + b\left(\frac{1}{a} - bY\right)^{-\lambda-1}} = \frac{1}{\left(\frac{X}{Y}\right)^{\lambda+1} \left[1 + \frac{b}{\left(\frac{1}{aY} - b\right)^{\lambda+1}}\right]}. \quad (\text{S2.2})$$

When  $X$  tends to zero,  $Y$  also tends to zero and the term into square brackets tends to  $I$  which means that:

$$\frac{dY}{dX} \rightarrow \left(\frac{Y}{X}\right)^{\lambda+1}. \quad (\text{S2.3})$$

- 10 Taking into account Eq. (S2.1), we have:

$$\left(\frac{Y}{X}\right)^{\lambda+1} = \left[1 - \left(\frac{1}{aY} - b\right)^{-\lambda}\right]^{\frac{\lambda+1}{\lambda}}, \quad (\text{S2.4})$$

which tends to  $I$ .

## S.3 Transcendental forms of the basic equations $E/P = B_1(\Phi_p)$ and $E/E_p = B_2(\Phi_p^{-1})$

- 15 Eqs. (4) and (5) have the same following form:

$$y = (1 + x^{-\lambda})^{-1/\lambda}, \quad (\text{S3.1})$$

with  $x = \Phi_p$  and  $y = E/P$ . Eq. (S3.1) can be also written as:

$$x = (y^{-\lambda} - 1)^{-1/\lambda}. \quad (\text{S3.2})$$

With similar notations, Eq. (23) can be written as:

$$20 \quad y + (y^{-\lambda} - 1)^{-1/\lambda} = x + (1 + x^{-\lambda})^{-1/\lambda}. \quad (\text{S3.3})$$

Eq. (S3.3) is equivalent to  $y + x = x + y$ , which means that S3.1 or S3.2 are solutions of Eq. (S3.3).

A similar reasoning can be conducted with Eq. (24), which can be written with  $X = \Phi_p^{-1}$  and  $Y = E/E_p$ :

$$\left[1 - Y + (1 + X^{-\lambda})^{-1/\lambda}\right]^{-\lambda} = Y^{-\lambda} - X^{-\lambda}. \quad (\text{S3.4})$$

Given that Eq. (S3.1) is verified by  $X$  and  $Y$ :

$$25 \quad Y^{-\lambda} = 1 + X^{-\lambda}. \quad (\text{S3.5})$$

Eq. (S3.4) is equivalent to  $I = I$ , which means that Eq. (S3.1) or (S3.2) is solution of Eq. (S3.4).

#### S.4 Calculations made with the Fu-Zhang equation

The Fu-Zhang equation is written as:

$$\frac{E}{P} = 1 + \Phi_p - \left[1 + (\Phi_p)^\omega\right]^{\frac{1}{\omega}}. \quad (\text{S4.1})$$

First, we study the feasible domain of the drying power of the air  $E_a$  and the correspondence with the evaporation rate  $E$ .

5 Inserting Eq. (S4.1) into Eq. (9) yields:

$$\frac{E_a}{E_p} = D(\Phi_p^{-1}) = \left(1 + \frac{\Delta}{\gamma}\right) \left(1 - \frac{1}{(1+b)\alpha_w} \left\{1 + b \left[1 + \Phi_p^{-1} - (1 + \Phi_p^{-\omega})^{\frac{1}{\omega}}\right]\right\}\right). \quad (\text{S4.2})$$

The limits given in Eqs. (11), (12) and (13) are independent from the Budyko function used. Consequently  $D^*$  remains unchanged:

$$D^* = \frac{b}{(1+b)\alpha_w} \left(1 + \frac{\Delta}{\gamma}\right). \quad (\text{S4.3})$$

10 Using a similar reasoning as in Eqs (14), (15), (16) and (17), we obtain:

$$d^* = 2^{\frac{1}{\omega}} - 1, \quad (\text{S4.4})$$

$$\omega = \frac{\ln 2}{\ln(d^* - 1)}, \quad (\text{S4.5})$$

$$\delta^* = \left(1 + \frac{\Delta}{\gamma}\right) \frac{b}{(1+b)\alpha_w} \left(1 - 2^{-\frac{1}{\omega}}\right) = D^* d^*. \quad (\text{S4.6})$$

Second, we link the Priestley-Taylor coefficient  $\alpha_0$  to the Fu-Zhang shape parameter  $\omega$ . Substituting  $E_p$  in Eq. (S4.1)

15 by its value given by Eq. (18) and putting  $\Phi_0 = E_0/P$  gives:

$$\frac{E}{P} = 1 + \frac{(1+b)\alpha_w}{\alpha_0} \Phi_0 - b \frac{E}{P} - \left\{1 + \left[\frac{(1+b)\alpha_w}{\alpha_0} \Phi_0 - b \frac{E}{P}\right]^\omega\right\}^{\frac{1}{\omega}}. \quad (\text{S4.7})$$

Eq. (S4.7) can be rewritten as:

$$\left[1 + (1+b) \left(\frac{\alpha_w}{\alpha_0} \Phi_0 - \frac{E}{P}\right)\right]^\omega = 1 + \left[(1+b) \frac{\alpha_w}{\alpha_0} \Phi_0 - b \frac{E}{P}\right]^\omega. \quad (\text{S4.8})$$

An equation similar to Eq. (21) can be obtained expressing  $E/E_0$  as a function of  $\Phi_0^{-1} = P/E_0$ :

$$20 \left[1 + \frac{(1+b)}{\Phi_0^{-1}} \left(\frac{\alpha_w}{\alpha_0} - \frac{E}{E_0}\right)\right]^\omega = 1 + \left(\frac{1}{\Phi_0^{-1}}\right)^\omega \left[\frac{(1+b)\alpha_w}{\alpha_0} - b \frac{E}{E_0}\right]^\omega. \quad (\text{S4.9})$$

Eqs. (S4.8) and (S4.9) obtained from the Fu-Zhang formulation correspond respectively to  $E/P = B_1'(\Phi_0)$  (Eq. 20) and  $E/E_0 = B_2'(\Phi_0^{-1})$  (Eq. 21) obtained with the Turc-Mezentsev equation.

Using a similar reasoning as in Eq. (22), the expression of  $\alpha_0$  can be inferred by matching Eqs. (S4.8) and (S4.1): for a given value of the aridity index  $\Phi$ , we have the same value of  $E/P$ . This leads to:

$$25 \left\{(1+b) \left[\left(\frac{\alpha_w}{\alpha_0} - 1\right) \Phi + (1 + \Phi^\omega)^{\frac{1}{\omega}}\right] - b\right\}^\omega = 1 + \left\{\left[\frac{(1+b)\alpha_w}{\alpha_0} - b\right] \Phi + b(1 + \Phi^\omega)^{\frac{1}{\omega}} - b\right\}^\omega. \quad (\text{S4.10})$$

Eq. (S4.10) is equivalent to Eq. (22), but with a transcendental form. It can be resolved numerically and Fig. (S1) shows the variation of the Priestley-Taylor coefficient  $\alpha_0$  as a function of the aridity index  $\Phi$  for different values of the  $\omega$  parameter. The shape of the curves is very similar to those of Fig. (5a) obtained with the parameter  $\lambda$  of the Turc-Mezentsev function.

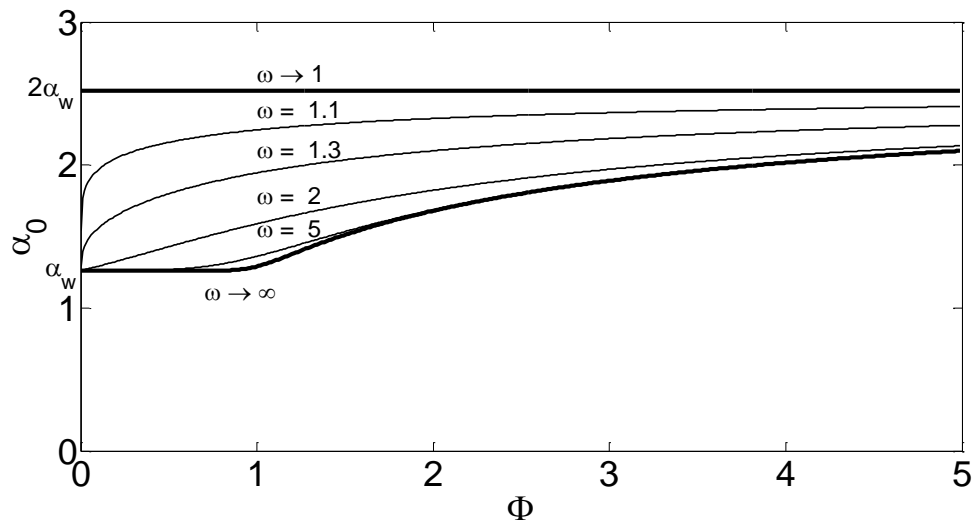

5 **Figure S1: Variation of the Priestley-Taylor coefficient  $\alpha_0$  with  $b = 1$  as a function of the aridity index  $\Phi$  for different values of the shape parameter  $\omega$  of the Fu-Zhang function. The bold lines indicate the limits of the feasible domain.**

S.5 Results obtained with the Turc-Mezentsev function making  $b = 4.5$  instead of  $b = 1$

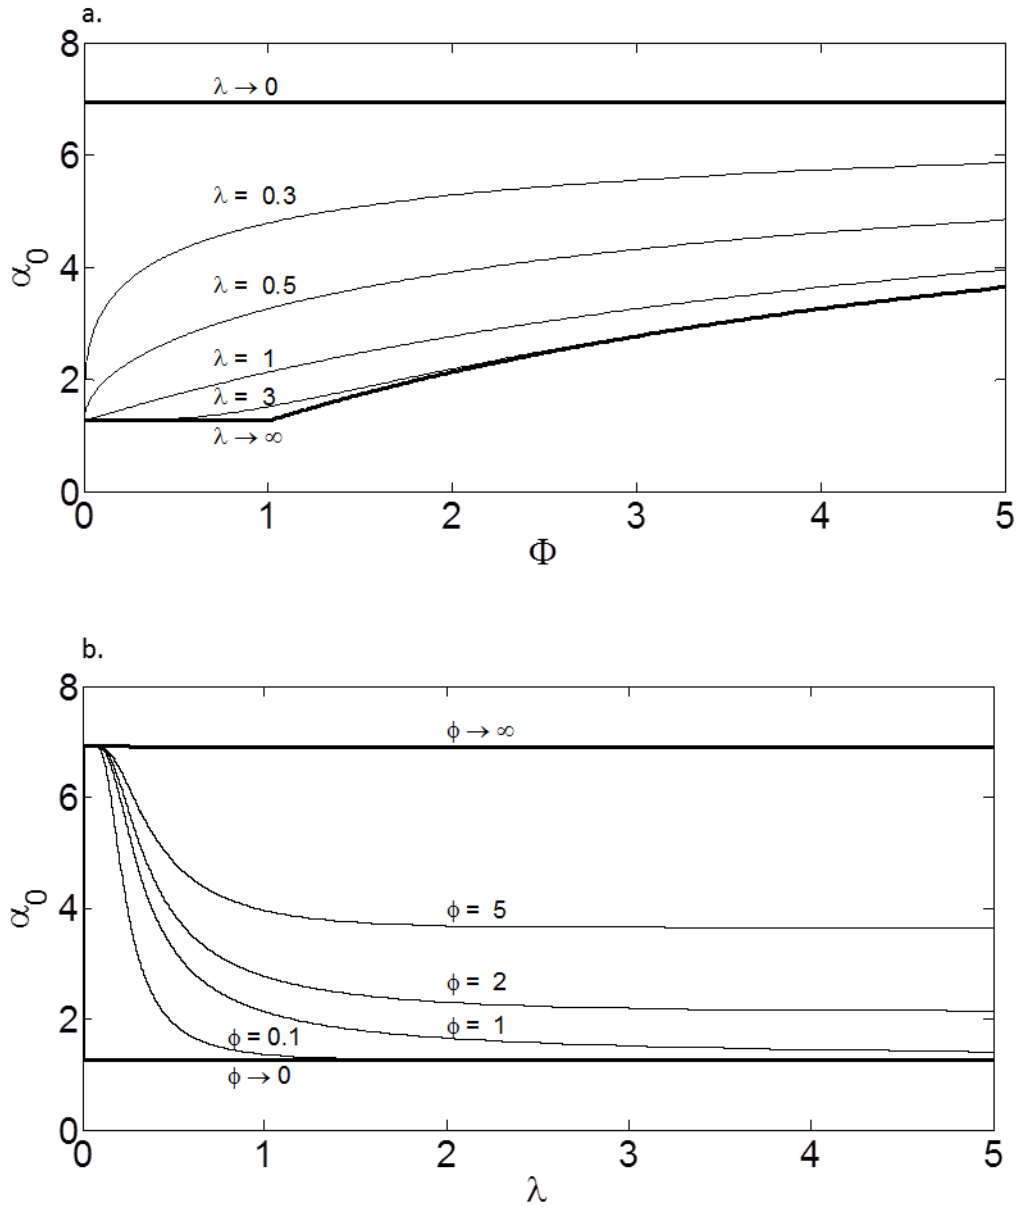

5 **Figure S2: Variation of the Priestley-Taylor coefficient  $\alpha_0$  (Eq. (22) with  $b = 4.5$  and  $\alpha_w = 1.26$ ): (a) as a function of the aridity index  $\Phi$  for different values of the shape parameter  $\lambda$  of the Turc-Mezentsev function; (b) as a function of  $\lambda$  for different values of the aridity index  $\Phi$ . The bold lines indicate the limits of the feasible domain.**
